# Simulation of P2X-mediated calcium signaling in microglia

Ben Chun<sup>1</sup>    Bradley D. Stewart<sup>1</sup>    Darin Vaughan<sup>1</sup>  
Adam D. Bachstetter<sup>2</sup>    Peter M. Kekenos-Huskey<sup>1\*</sup>

June 23, 2018

## Abstract

Microglia function is orchestrated through highly-coupled signaling pathways that depend on calcium ( $\text{Ca}^{2+}$ ). In response to extracellular adenosine triphosphate (ATP), transient increases in intracellular  $\text{Ca}^{2+}$  driven through the activation of purinergic receptors,  $\text{P}_2\text{X}$  and  $\text{P}_2\text{Y}$ , are sufficient to promote cytokine synthesis and potentially their release. While steps comprising the pathways bridging purinergic receptor activation with transcriptional responses have been probed in great detail, a quantitative model for how these steps collectively control cytokine production has not been established. Here we developed a minimal computational model that quantitatively links extracellular stimulation of two prominent ionotropic purinergic receptors,  $\text{P}_2\text{X}_4$  and  $\text{P}_2\text{X}_7$ , with the graded production of a gene product, namely the tumor necrosis factor  $\alpha$  ( $\text{TNF}\alpha$ ) cytokine. In addition to  $\text{Ca}^{2+}$  handling mechanisms common to eukaryotic cells, our model includes microglia-specific processes including ATP-dependent  $\text{P}_2\text{X}_4$  and  $\text{P}_2\text{X}_7$  activation, activation of NFAT transcription factors, and  $\text{TNF}\alpha$  production. Parameters for this model were optimized to reproduce published data for these processes, where available. With this model, we determined the propensity for  $\text{TNF}\alpha$  production in microglia, subject to a wide range of ATP exposure amplitudes, frequencies and durations that the cells could encounter *in vivo*. Furthermore, we have investigated the extent to which modulation of the signal transduction pathways influence  $\text{TNF}\alpha$  production. Our key findings are that  $\text{TNF}\alpha$  production via  $\text{P}_2\text{X}_4$  is maximized at low ATP when subject to high frequency ATP stimulation, whereas  $\text{P}_2\text{X}_7$  contributes most significantly at millimolar ATP ranges. Given that  $\text{Ca}^{2+}$  homeostasis in microglia is profoundly important to its function, this computational model provides a quantitative framework to explore hypotheses pertaining to microglial physiology.

## 1 Introduction

Microglia, the tissue macrophages of the central nervous system (CNS), account for approximately 10% of CNS cells. Beyond their role as immune cells, microglia have essential physiological functions that maintain the health of the nervous system. Microglia express cell surface receptors, which, in ways that are not fully understood, integrate extracellular signals in the milieu to guide microglia to modify their local environment selectively. Examples of how microglia modulate neuronal circuits to alter CNS function include the pruning of synapses (for review see: [1]), and through the release of bioactive molecules, such as cytokines. The cytokine tumor necrosis factor alpha ( $\text{TNF}\alpha$ ) is a microglia secreted molecule that can directly increase and decrease the balance of excitatory and inhibitory neurotransmission, by regulating AMPA and  $\text{GABA}_A$  receptors (for review see: [2]). In the bidirectional communication between microglia, and other neural cells, ATP has a particularly significant role in the cell-to-cell communication of microglia. While some of the microglia signal transduction pathways activated by ATP are known in considerable detail (for review see: [3]), how these pathways are integrated and scaled to orchestrate a specific cellular response remains to be defined. Computational systems biology has emerged as a powerful tool towards bridging external stimuli (i.e.,

ATP) with phenotypical outputs (i.e., TNF $\alpha$ )[4]. Our goal is to establish a computational systems biology model of ATP-dependent signaling pathways in microglia to probe for factors that contribute to increased TNF $\alpha$ . To our knowledge, models for ATP-dependent glial function are scarce. Some limited modeling of purinergic receptor gating ( $P_2X$ )[5, 6, 3, 7, 8, 9, 10, 11], as well as IP $_3$ -mediated Ca $^{2+}$  signaling[12] has been generated, but these models have not integrated the signaling mechanisms starting with external ATP stimuli and ultimately leading to TNF $\alpha$ . ATP binds to purinoceptors localized to microglial plasma membrane (PM). Purinoceptor activation is strongly associated with dramatic changes in intracellular Ca $^{2+}$  content and Ca $^{2+}$ -dependent signaling cascades linked to gene expression. Changes in Ca $^{2+}$  in response to ATP can occur directly through the opening of Ca $^{2+}$  non-selective ionotropic channels ( $P_2X$ ), or indirectly by metabotropic receptors ( $P_2Y$ ) that utilize second messengers like IP $_3$ . Of the  $P_2X$  receptors,  $P_2X_4$  and  $P_2X_7$  are the most abundant channels expressed in microglial membrane[3]. These channels respond to micromolar and millimolar ATP, respectively,[7, 13] with  $P_2X_4$  generally presenting more rapid deactivation times compared to  $P_2X_7$ [14].  $P_2X$  activation by ATP causes increased production and release of TNF $\alpha$  by microglia [8]. ATP-dependent TNF $\alpha$  production is also strongly correlated with both Ca $^{2+}$  and increased p38 phosphorylation[8]. Ca $^{2+}$ -dependence of NFAT activation via calcineurin[15, 16] has also been implicated in the ATP-dependent release of TNF $\alpha$  from microglia[17, 18].

We hypothesized that the increased microglia TNF $\alpha$  production, controlled dynamically by ATP binding to  $P_2X$  receptors, involves Ca $^{2+}$  signaling and namely calcineurin (CN)-nuclear factor of activated T-cells (NFAT) signal transduction. Toward investigating this hypothesis, we integrated Markov models of  $P_2X_4$  and  $P_2X_7$  activation[5, 19], and Ca $^{2+}$  homeostasis[15, 20, 21, 22]. Microglia utilize diverse mechanisms to control Ca $^{2+}$  homeostasis and Ca $^{2+}$ -dependent responses to external stimuli, of which, many are broadly used by nearly all eukaryotic cells. These mechanisms encompass external Ca $^{2+}$  entry, the triggering of intracellular Ca $^{2+}$  release by way of second messengers, Ca $^{2+}$  binding to buffers and effectors, as well as Ca $^{2+}$  clearance via pumps and exchangers[23]. The mechanisms of Ca $^{2+}$  homeostasis tested in our model include Na $^+$ /Ca $^{2+}$  exchanger (NCX) and Sarcoplasmic/endoplasmic reticulum calcium ATPase (SERCA), and Ca $^{2+}$ -dependent control of TNF $\alpha$  transcription, for which models have been developed for other cell types, such as cardiac cells [21, 24]. Results of our computational model suggest that short/pulsatile ATP is likely sufficient to invoke production of the TNF $\alpha$  via  $P_2X_4$ . Long duration and high amplitude ATP exposure is necessary for production via  $P_2X_7$ . Both effects are determined critically by sustained elevation of Ca $^{2+}$  load that exceed intrinsic rates of NCX-mediated Ca $^{2+}$  extrusion. In summation, with this computational model, we provide a framework to challenge our current understanding of microglia physiology and motivate new hypotheses and avenues of experiments.

## 2 Methods

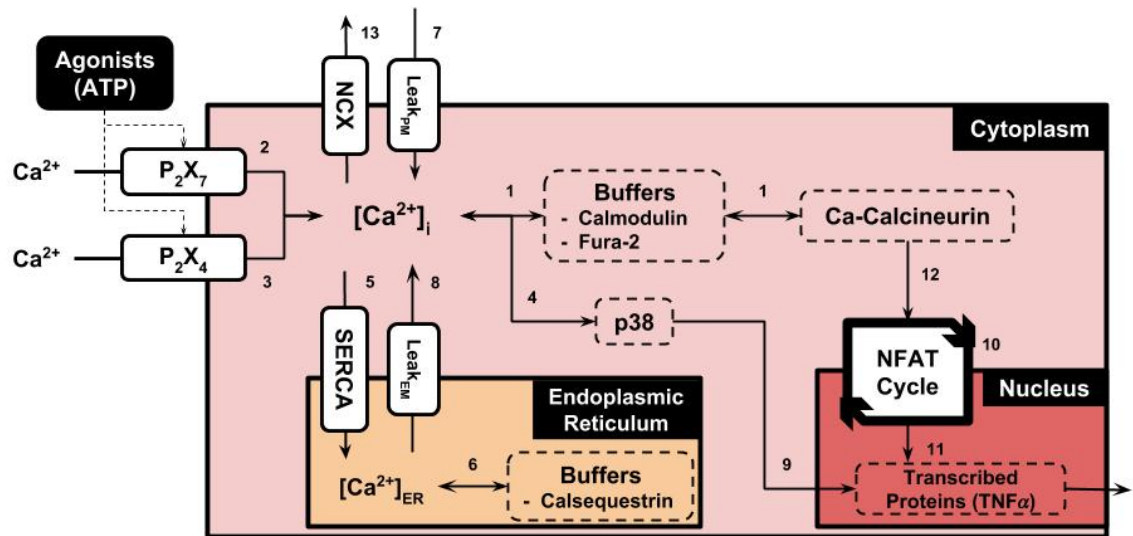

Figure 1: Schematic of the microglial signaling model assumed in this study. Table S1 provides a summary of the numbered pathways in this diagram, as well as a link to the corresponding equations in the Supplement. In this schematic, ATP activates the purinoceptors,  $P_2X_4$  and  $P_2X_7$ , which culminates in the exocytosis of TNF $\alpha$ .

## 2.1 Microglial $\text{Ca}^{2+}$ model (Fig. 1)

Our computational model of  $\text{P}_2\text{X}$ -mediated microglial signaling portrayed in Fig. 1 assumes:

1. ATP-dependent activation of  $\text{P}_2\text{X}$  receptors, assuming pharmacologic inhibition of  $\text{P}_2\text{Y}$  receptors [25] (see Sect. A.3.1)
2.  $\text{Ca}^{2+}$ -dependent activation of signaling proteins calmodulin (CaM), CN, NFAT, as well as  $\text{Ca}^{2+}$  extrusion and uptake mechanisms (see Sect. A.3.4)
3.  $\text{TNF}\alpha$  transcription, translation and exocytosis (see Sect. A.3.5). For clarity, we numbered these reactions and list their supporting literature in Table S1. While microglial regulatory mechanisms are complex and involve a great variety of channels, proteins and processes that we neglect here, our minimal model permits quantitative descriptions of  $\text{P}_2\text{X}$ -mediated behavior with a tractable number of equations and parameters. These equations form the basis of time-dependent ordinary differential equations (see Sect. A.3) that we numerically integrate, subject to a variety of experimental conditions described below. Parameters for these equations are summarized in Sect. A.1. Where possible, these parameters were adopted from the literature, although in many cases these parameters were refitted to reproduce experimental data measured in microglia. The experimental data against which our models were fitted or validated were drawn from pubmed database searches. If appropriate, we identified in the validation commentary data sets that were in disagreement. Frequently, variation in data sets could be attributed to differences in cell lines used by the experimentalists, conditions to which the cells were subjected, as well as known heterogeneities in cell phenotype [26, 27]. Since cell-to-cell variation can be significant, we present sensitivity analyses in our results that indicate the extent to which differences in protein expression and activity influence measured observables.

## 2.2 Simulation

### 2.2.1 Numerical model of $\text{Ca}^{2+}$ handling

The microglial model was implemented in the Generalized ODE Translator gotran (<https://bitbucket.org/johanhake/gotran>) framework as described previously [28]. The gotran model was compiled into a Python module to make use of our Python-based routines for simulation and analyses. In our numerical experiments, the microglia model was numerically integrated by the scipy function ODEINT, which utilizes the LSODA algorithm for stiff ordinary differential equations (ODEs) [29]. The numerical model was integrated using a timestep of 0.1 ms for a total simulation time of up to 180 min. These simulations provide as output the time-dependent values of model states, such as intracellular  $\text{Ca}^{2+}$  or the open gates of the  $\text{P}_2\text{X}$  channels. Model fitting proceeded by a genetic algorithm (reviewed in [30]) that iteratively improved parameter values, such as  $\text{P}_2\text{X}_4$  conductance and PM  $\text{Ca}^{2+}$  leak over several generations of progeny. Parameters for the model components are summarized in Sect. A.1. Based on these parameterizations, our key model outputs were  $\text{Ca}^{2+}$  transients with respect to ATP exposure durations and concentrations, as well

subsequent changes in NFAT activation and TNF $\alpha$  exocytosis. Experimentally-measured outputs, such as Ca<sup>2+</sup> transient decay time and amplitude, were measured for each of the progeny; those that reduced output error relative to the experimentally-measured equivalent were stored for future generations. To validate our implementation, we present comparisons against predicted channel current profiles, intracellular Ca<sup>2+</sup> content, activation of NFAT and pp38, as well as TNF $\alpha$  in the Results section.

### 2.2.2 Analysis

To examine potential mechanisms that link increased P<sub>2</sub>X stimulation to TNF $\alpha$  production, we monitored and identified prominent changes in key ‘state’ variables (including total amount of calcineurin, calmodulin, nuclear factor of activated T-cells, the density of purinoceptors, and the influx capacity) relative to control conditions. These sensitivity analyses were performed to determine relative correlations between model input parameters and predicted outputs (see Supplement). Data processing was performed using SCIPY and the IPython notebooks. All codes written in support of this publication will be publicly available at <https://bitbucket.org/pkhlab/pkh-lab-analyses>. Simulation-generated data are available upon request.

## 3 Results

### 3.1 plasma membrane (PM) Ca<sup>2+</sup> influxes and effluxes

In analogy to studies of P<sub>2</sub>X function in microglia conducted by Davalos *et al.* [25], for which P<sub>2</sub>Y activity was pharmacologically inhibited, our study assumed P<sub>2</sub>X channels comprise the primary mechanism of direct (ionotropic) Ca<sup>2+</sup> entry following ATP treatment. We further assumed P<sub>2</sub>X-mediated Ca<sup>2+</sup> entry arises predominantly from P<sub>2</sub>X<sub>7</sub> and to a lesser extent, P<sub>2</sub>X<sub>4</sub>. The activation of the P<sub>2</sub>X<sub>7</sub> and P<sub>2</sub>X<sub>4</sub> receptors has been well-characterized in the literature, particularly through whole-cell electrophysiological methods using channels expressed in HEK cells as well as in microglia [31, 32, 33, 34, 14, 35]. P<sub>2</sub>X<sub>4</sub> activation is triggered at micromolar ATP, which culminates in a rapid (< 1 second) sharply peaked current profile that decays within tens of seconds [36]. P<sub>2</sub>X<sub>7</sub> receptors, on the other hand, respond to millimolar ATP concentrations, but in contrast to P<sub>2</sub>X<sub>4</sub>, maintain significant current over long durations of ATP exposure [8, 37, 38]. As a first step toward the validation of our microglial Ca<sup>2+</sup> model, we sought to reproduce the unique current profiles for the respective channels over appropriate ranges and durations of ATP exposure, using a Markov model adapted to microglia P<sub>2</sub>X activation [37].

The Markov model framework assumed in this study captures the time-evolution of channel gating states; of these states, the channel current is proportional to the probability of the open state. While Markov models have been reported in the literature [37, 5, 19, 39], including 12- and 13- state models from Khadra *et al.* and Zemkova *et al.*, for the sake of parsimony we merged gating states that were in rapid equilibrium relative to state transitions that abide

much slower kinetics [40]. In Sect. A.3.1, we summarize the Markov models and their parameterizations for  $P_2X_4$  and  $P_2X_7$ , respectively. Given the model reformulation, it was essential to ensure that our model reproduced experimentally-measured currents attributed to  $P_2X_7$  and  $P_2X_4$  in microglia. Here, we validate the fitted  $P_2X_4$  and  $P_2X_7$  models by comparing our predicted current profiles against those measured for  $P_2X_4$  by Toulme *et al.*[9] and  $P_2X_7$  by Chessell *et al.*[38].

We first present in Fig. 2A for  $P_2X_4$  predicted currents versus recordings conducted using  $P_2X_4$  transfected into microglia [9]. According to their study, the mutated  $P_2X_4$  channels were expressed and induced  $\sim 30$ -fold stronger inward currents compared to its normal resting cells. For this reason, the  $P_2X_4$  responses assumed in our model are more typical of activated microglia [36]. In Fig. 2A we present two sets of modeling predictions: 1) using the ‘full’ model from Zemkova *et al.* and 2) our ‘lumped’ model, for which the open states Q1 and Q2 in the ‘full’ model are consolidated into a single Q12 ‘macro-state’. At 100  $\mu$ M, both the full and lumped models closely follow the currents measured by Toulme *et al.*, namely, they capture the sharp peak of approximately -375 pA in the early phase of ATP pulse, after which the current rapidly decays. A notable distinction between the two model formulations is that the lumped model presents a modestly faster rate of current decay in the presence of ATP, relative to the full model. Moreover, upon removal of ATP, the lumped model current rapidly extinguishes, whereas the full model more gradually decays. In Fig. S2 we demonstrate that our Q12 ‘macro-state’ mirrors the summation of the Q1 and Q2 states with exception to the phase after ATP removal, hence the merging of the Q1 and Q2 states introduces some error into the current dynamics. Nevertheless, both model representations yield nearly identical channel current profiles for all but the final seconds of ATP treatment, thus our reduced model is sufficiently accurate for modeling rates of  $Ca^{2+}$  entry following ATP-dependent  $P_2X_4$  activation. We also present current predictions at 10  $\mu$ M and 1 mM ATP for comparison; as anticipated, the reduced ATP treatment leads to a smaller (125 pA) current maximum, while a 10-fold increase in ATP is indistinguishable from that reported for 100  $\mu$ M ATP. Lastly, we demonstrate that the lumped model retains the desensitization behavior established in  $P_2X_4$ , as the channel peak amplitude is reduced following a second ATP treatment.

In Fig. 2B, we provide analogous current profiles stemming from  $P_2X_7$  activation, subject to  $1 \times 10^{-1}$  mM-1.0 mM ATP for 0.5 seconds as reported by Chessell *et al.*[38]. In contrast to  $P_2X_4$ , the  $P_2X_7$  current profile exhibits a slower rise to peak current compared to  $P_2X_4$  and a slower rate of current decay. We additionally find that the both the full and lumped models overestimate the rate at which peak current is exhibited, as well as underestimate the rate of current decay. While we could expect better agreement by introducing additional states, the high degree of overlap between the model predictions and the measured data suggests that minor discrepancy will not appreciably impact our estimates of  $Ca^{2+}$  entry by these channels. We also report in Fig. 2B the  $P_2X_7$  channel profile when subject to 1.0 mM ATP over a 30 second interval. Under this condition, the channel exhibits a long-lived plateau that is sustained



over the entire duration of ATP treatment. This extended plateau is a common gating attribute of  $P_2X_7$  receptors [14] and is speculated to arise from a dilated open-pore structure following extended activation [35, 8]. Overall, these data suggest that our implementation of the  $P_2X_4$  and  $P_2X_7$  Markov models faithfully reproduce  $Ca^{2+}$  current profiles across a variety of ATP applications, and moreover, the channel dynamics exhibit vary considerably depending on the amplitude and duration of ATP exposure. Unless otherwise noted, all further applications of our model assume both channels are active and can be simultaneously activated by applied ATP.

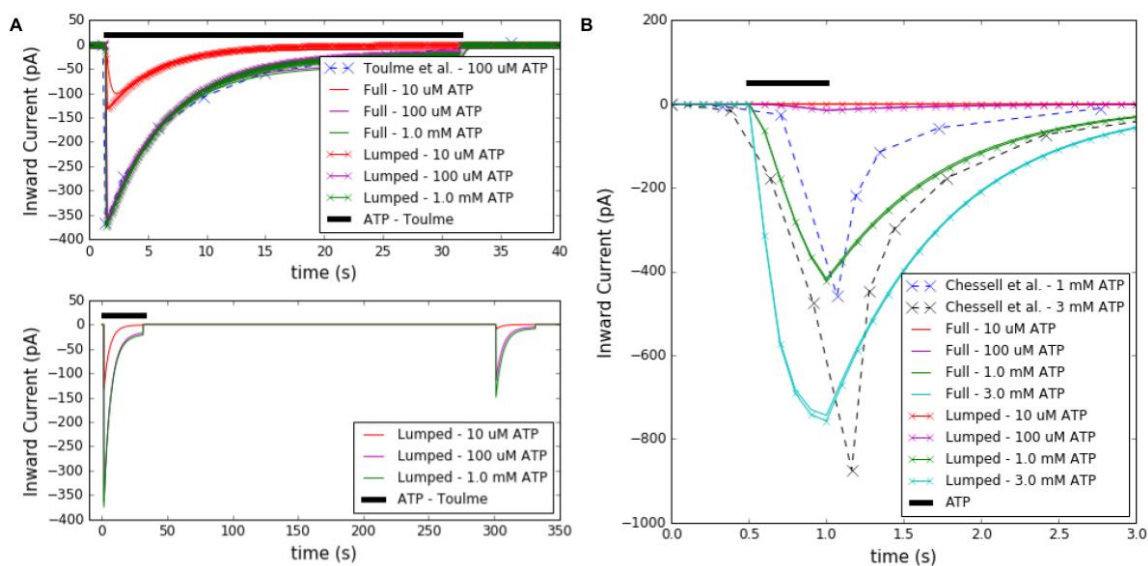

Figure 2: A. Inward  $P_2X_4$  current profile recorded in microglia (blue dashed) by Toulme *et al.*[9] and the model prediction (purple solid) when subject to 100  $\mu$ M ATP for 30 seconds. Additional predicted profiles are given for 10  $\mu$ M and 1 mM ATP to demonstrate desensitization. B. Inward  $P_2X_7$  currents measured in microglia by Chessell *et al.*[38] as well as the model predictions, when subject to 10  $\mu$ M to 3 mM ATP for 0.5 seconds. Parameters and conditions to model the experimental conditions are listed in Table S2. .

In complement to  $P_2X$ -driven  $Ca^{2+}$  entry, Na/Ca exchanger (NCX) and the plasma membrane ATPase comprise the primary mechanisms for extruding cytosolic  $Ca^{2+}$  and restoring basal  $Ca^{2+}$  content in glia [41, 42] and likely in microglia [3]. Given the lack of published experimental data for the role of plasma membrane ATPases in microglia  $Ca^{2+}$  management [3], we neglected their contribution in the model. In addition, a modest PM leak term was incorporated to maintain  $Ca^{2+}$  steady state at rest. This addition was necessary to counterbalance a slight NCX  $Ca^{2+}$  efflux owing to the -23 mV membrane potential assumed in the model [43]. We present in Sect. A.3.2 predictions using an NCX a model developed for NCX ion exchange in cardiac cells of rabbit origin [21], refitted here for microglia  $Ca^{2+}$  handling. Since the membrane potential in microglia under normal conditions maintains a modest negative potential of approximately -20 mV [3], NCX primarily extrudes  $Ca^{2+}$ . Nevertheless, we validated our model against single-cell traces reported in Fig 5 of [43], for which significant positive NCX currents were reported from -40 mV to 60 mV (0-200 pA, see Fig. S3). Here we note that the activity characterized in [43] was conducted in Krebs medium solution, the  $Na^+$  concentration of which was comparable to the 145 mM assumed in our model. Importantly, our data successfully reproduce the experimentally measured currents under the aforementioned solution conditions. We note that our model may overestimate the contribution of NCX to  $Ca^{2+}$  extrusion rates, given the omission of PM ATPase activity. Nevertheless, our parameterization appeared sufficient to maintain resting  $Ca^{2+}$  levels, as well as restore  $Ca^{2+}$  levels following  $P_2X_4$  stimulation. We illustrate this with  $Ca^{2+}$  transients reported in Fig. ??, which demonstrate consistent relaxation to resting  $Ca^{2+}$  concentrations of  $9.5 \times 10^{-2} \mu M$  following  $P_2X_4$  stimulation.

### 3.2 Cytosolic $Ca^{2+}$ -dependent signaling

Critical to relating PM  $Ca^{2+}$  influxes to intracellular  $Ca^{2+}$  was the incorporation of a  $Ca^{2+}$  buffering term in the model.  $P_2X$  activation can contribute millimolar total  $Ca^{2+}$  to the cytosol (see Fig. 3A) total  $Ca^{2+}$  to the cytosol depending on the duration of ATP exposure, though free  $Ca^{2+}$  was found to generally increase by less than  $5 \times 10^{-2} \mu M$  in Hide *et al.*[8], against which we fit our model. We therefore utilized the ratiometric measurements of Fura-loaded cells presented in [8] to estimate the free  $Ca^{2+}$  following substantial buffering by  $Ca^{2+}$  binding proteins [23]. Accordingly, we plot our predictions of  $Ca^{2+}$  transients following  $P_2X$  stimulation in Fig. 3. To obtain reasonable matches with the Hide *et al.* measurements, refitting of the  $P_2X$  constants was required. Overall, we were able to reasonably reproduce  $Ca^{2+}$  transients measured following 100  $\mu M$  and 1 mM ATP treatments, though our predicted currents at 100  $\mu M$  ATP decayed more rapidly than indicated by the  $Ca^{2+}$  transient data. At 10  $\mu M$  ATP, however, we predicted much smaller  $Ca^{2+}$  transients, as our model suggests only  $P_2X_4$  significantly contributes at this concentration. It is possible that there may be cell-to-cell variations in the expression of  $P_2X_4$  and  $P_2X_7$  that could

account for this unexpected behavior, or the activation of a purinergic receptor not accounted for in our model.

Given our fitted model, integration of the  $P_2X$  current profile over 400 seconds and noting roughly 8% of  $P_2X$  current is attributed to  $Ca^{2+}$  [6], we estimate that the channels conduct sufficient  $Ca^{2+}$  to elevate the cytosol concentration by several millimolar. However, since analogous ATP exposure profiles in Fig. 3 reflected roughly 50 nM increases in  $Ca^{2+}$  content from basal levels, the vast majority of  $Ca^{2+}$  that enters the cytosol is buffered, as is typical in a variety of eukaryotic cells [23]. Therefore, it is evident that  $Ca^{2+}$  is significantly buffered in microglia, although we are unable to attribute the buffering to a specific set of  $Ca^{2+}$  proteins. Two candidates for buffering include CaM and ionized calcium-binding adapter molecule 1 (Iba-1), in addition to contributions from binding to the plasma membrane [44] and  $Ca^{2+}$  indicators used for characterizing the cytosolic  $Ca^{2+}$  transients. Although CaM content may be scarce in resting microglia [45], the ability to activate NFAT suggests there exists an extant pool capable of binding  $Ca^{2+}$ . Further, Iba-1 is a known  $Ca^{2+}$ -binding protein in microglia that could contribute to the buffering of cytosolic  $Ca^{2+}$  [46].

In addition to  $Ca^{2+}$  influxes and effluxes mediated by NCX and  $P_2X$ , we reflect  $Ca^{2+}$  exchange with the endoplasmic reticulum (ER). Specifically, we include endoplasmic reticulum (ER)  $Ca^{2+}$  uptake via SERCA as well as a concentration-dependent ER  $Ca^{2+}$  leak in order to maintain constant ER  $Ca^{2+}$  content of 800  $\mu M$  [12]. To our knowledge measurements of SERCA function and effects on ER  $Ca^{2+}$  in microglia are not well established, therefore we utilized SERCA parameters from Shannon *et al.* [21]. In principle, the ER  $Ca^{2+}$  leak assumed in our model to counterbalance SERCA uptake likely corresponds to spontaneous  $IP_3$ -mediated ER release [12], though including such contributions was beyond the scope of our study, for which we assumed  $P_2Y$  are inhibited. In Fig. S5 we demonstrate that ER  $Ca^{2+}$  load increases in response to  $P_2X$  activation with a modest lag relative to the cytosolic  $Ca^{2+}$  transient, but returns to resting load after the termination of the membrane current. In other words, ER  $Ca^{2+}$  load is increased only transiently, which indirectly suggests that  $Ca^{2+}$  entering through the PM is extruded by another mechanism, namely NCX exchange. Hence, physiologically normal rates of  $Ca^{2+}$  entry via plasma membrane  $Ca^{2+}$  influx were compensated by NCX extrusion, and therefore were necessary for maintaining ER  $Ca^{2+}$  at resting levels when subject to infrequent or low-amplitude  $P_2X_4$  stimulation.

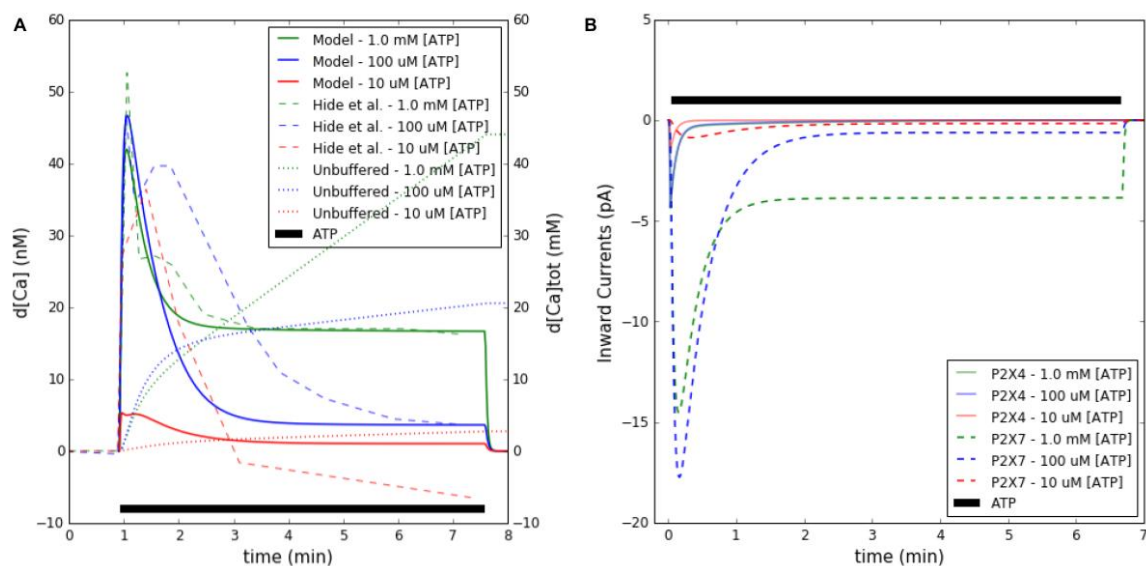

Figure 3: A. Predicted free cytosolic  $Ca^{2+}$  (solid) with respect to time, subject to ATP treatments of  $1.0 \times 10^1 \mu M$ -1.0 mM ATP for 400 s (black), compared to experimental data from mouse microglia (dashed) [8]. Complementary ER  $Ca^{2+}$  transients are reported in Fig. S5. B. Contributions of  $P_2X_4$  and  $P_2X_7$  currents to the  $Ca^{2+}$  transients. Parameters and conditions to model the experimental conditions are listed in Table S2. .

Ca<sup>2+</sup> dependent NFAT activation constitutes a prominent signal transduction pathway implicated in the release of inflammatory agents [47, 48] including TNF $\alpha$ [8, 27, 49, 50]. Of these, Ca<sup>2+</sup>-binding to CaM and CN, as well as subsequent binding of the Ca<sup>2+</sup>-saturated proteins to NFAT, is an established substrate for activation of this pathway [15]. Our implementation of the CaM/CN model was originally developed for cardiomyocytes by Saucerman et al [20], though we utilized parameters adapted by Bazzazi *et al.*[22] for HEK cells. Given that time-dependent CN activation data are not available in glia, we sought qualitative agreement between measurements of CN activation by Bazzazi *et al.*, subject to Ca<sup>2+</sup> transients that we tuned to be similar in amplitude to their data. Fig. S4 summarizes our qualitative comparisons, namely that the predicted CaM/Ca<sup>2+</sup>-saturated CN at low stimulation frequencies reaches a maximum that lags the peak Ca<sup>2+</sup> concentration by several seconds, while its decay is less rapid than that of the Ca<sup>2+</sup> transient. Further, a rapid frequency of pulsatile ATP exposure (1 second pulses at 0.5 Hz) was sufficient to maintain an elevated CaM/Ca<sup>2+</sup>-saturated CN. Both trends were consistent with the HEK data from Bazzazi *et al.*, though our data reflect slower relaxation kinetics, which we attribute to different rates of Ca<sup>2+</sup> uptake and extrusion mechanisms in microglia. Hence, we anticipate that transient increases in Ca<sup>2+</sup> arising from brief P<sub>2</sub>X stimulation will not lead to sustained CN activation, in contrast to transients of sustained duration.

We next tuned the kinetics of NFAT activation in our microglial model to agree with Western blot-based measurements of activated (dephosphorylated) NFAT from [51], for which the dephosphorylated factor was reported for several 3 mM ATP exposure durations and concentrations (15 min). Notably, we adjusted most of the reaction constants associated with NFAT cycle model from Cooling *et al.*[15] to reproduce percent changes in NFAT with respect to ATP exposure time up to 60 minutes, in accordance with the microglial data from Ferrari *et al.*[17].

Our predictions shown in Fig. 4 are in good agreement with experimental data as exposure time was varied, and for variations of concentrations up until 3 mM ATP. A decline in activated NFAT was reported by Ferrari *et al.* that we could not capture in the model. Moreover, assuming that NFAT activation at ATP concentrations below 1 mM arise from P<sub>2</sub>X<sub>4</sub>-mediated Ca<sup>2+</sup> current and P<sub>2</sub>X<sub>7</sub> increasing contributes Ca<sup>2+</sup> at and above this concentration, both channels are capable of eliciting NFAT responses.

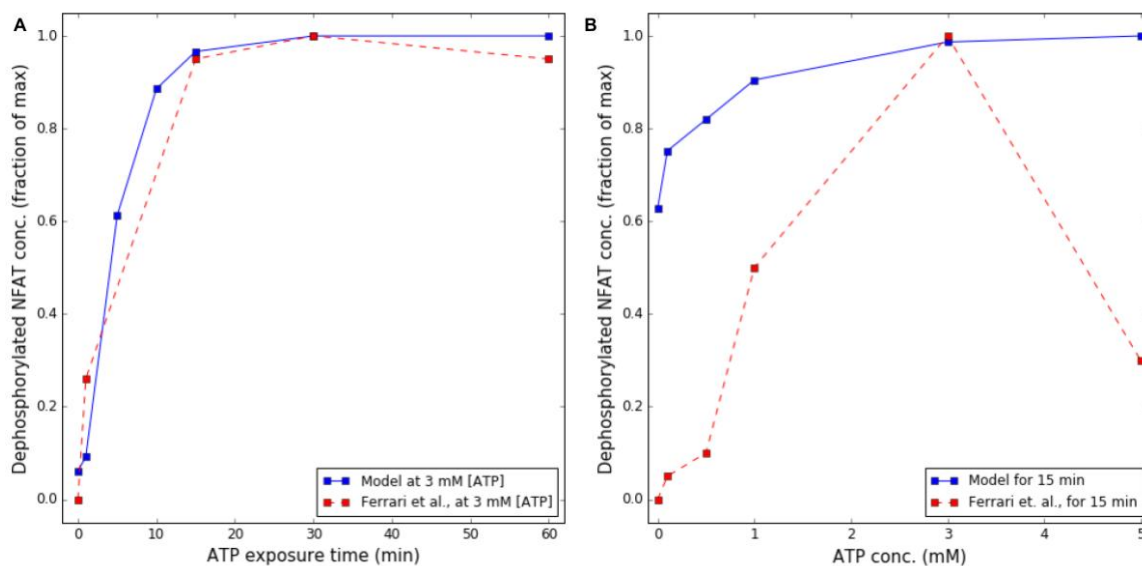

Figure 4: A. Activated (dephosphorylated) NFAT following 3 mM ATP treatment for up to 60 minutes recorded in Ferrari *et al.* [51](dashed) and predicted by the model (solid). B. Analogous predictions of activated NFAT, subject to 15 minute treatments of ATP up to 5 mM versus experiment [51] Parameters and conditions to model the experimental conditions are listed in Table S2. .

### 3.3 Transcriptional regulation

$P_2X$  activation, followed by elevation of cytosolic  $Ca^{2+}$  load whereby NFAT and p38 are activated (see Sect. A.5.1), culminate in cytokine production [8, 3, 52]. We therefore utilized phenomenological models to couple NFAT and pp38 control of  $TNF\alpha$  transcription, as summarized in Sect. A.3.5. Specifically, we assumed that  $TNF\alpha$  mRNA transcription is driven by the formation of a NFAT/DNA complex [53], the transcribed mRNA is partially protected from degradation in a pp38-dependent manner [54], thereby permitting increased rates of  $TNF\alpha$  protein translation and exocytosis [55]. It is important to note that additional regulatory mechanisms ultimately control the exocytosis of molecular cargo [56], but are represented only by approximation in this study.

In Hide *et al.* [8], enzyme-linked immunosorbent assay (ELISA) assays were conducted both 3 hours after 0 mM to 1 mM ATP treatments, as well as at 1 hour intervals using 3 mM ATP. The predicted  $TNF\alpha$  production rate data were fitted to experimental data provided by Hide *et al.* (see Fig. 5), primarily through modulating parameters that control messenger ribonucleic acid (mRNA) production, its degradation, translation and  $P_2X_7$ -dependent exocytosis. Here we make a simplifying assumption that the  $TNF\alpha$  exocytosis measured via Hide *et al.* scales proportionally to the mRNA production rate, provided that  $P_2X_7$  is activated, as we do not yet have a precise model for regulatory control of the entire exocytosis process following NFAT activation. The predicted  $TNF\alpha$  production data positively correlate with ATP concentration and duration of exposure, although the model overestimates release rates at 3 mM ATP and is less sensitive to ATP concentration than reported by Hide *et al.*. Though further refinement of the  $TNF\alpha$  transcription model could improve agreement with experiment (see Sect. 4.6), our model nevertheless demonstrates that even low levels of ATP can trigger  $TNF\alpha$  production, thereby suggesting sensitivity to both  $P_2X_7$  and  $P_2X_4$  activation.



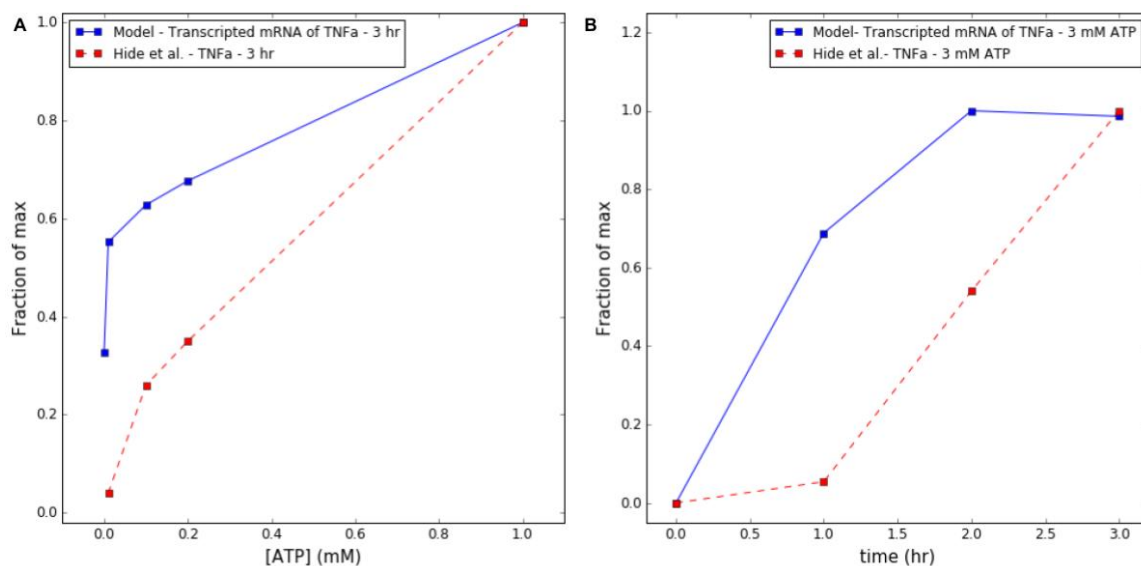

Figure 5: A. Predictions (solid) of TNF $\alpha$  mRNA production following 3 hours of micromolar to 1 millimolar ATP exposure versus exocytosed protein collected by Hide *et al.*[8] (dashed), assuming that exocytosed TNF $\alpha$  scales proportionally to mRNA transcription. B. TNF $\alpha$  release predictions (solid) as a function of time (hours), following 3 mM ATP treatment versus experiment (dashed) Parameters and conditions to model the experimental conditions are listed in Table S2. .

### 3.4 Effects of ATP waveform on intracellular $\text{Ca}^{2+}$ dynamics and $\text{TNF}\alpha$ production

Our overarching hypothesis in this study was that the duration, frequency and amplitude of ATP stimulation control the dynamics of the intracellular  $\text{Ca}^{2+}$  transient and ultimately, the ability to trigger  $\text{TNF}\alpha$  production. This hypothesis was chiefly motivated by observations that 1) low micromolar, high frequency (up to 0.5 Hz) quanta of ATP are released by astrocytes as part of their physiological function [57], 2)  $\text{P}_2\text{X}_4$  and  $\text{P}_2\text{X}_7$  present markedly different ATP-sensitivities and deactivation kinetics [14], and 3) non- $\text{P}_2\text{X}$ -specific  $\text{Ca}^{2+}$  entry via ionophores induces  $\text{TNF}\alpha$  mRNA production in T cells [58] and CCL3 (a chemokine) mRNA via NFAT in microglia [47]. To test this hypothesis, we subjected our model validated in the previous section to ATP pulses ranging in duration from 1-19 seconds, amplitudes of 0-1 mM, and frequencies of 0.083-0.5Hz. Here, we first discuss the degree to which these conditions changed the average intracellular  $\text{Ca}^{2+}$  content from values maintained at rest, after which we phenomenologically relate the  $\text{Ca}^{2+}$  content to the propensity for  $\text{TNF}\alpha$  release. Based on data presented in Fig. 6A, we find that high frequencies of low amplitude ATP stimulation are sufficient to increase the cytosolic  $\text{Ca}^{2+}$  load in a manner sufficient to promote  $\text{TNF}\alpha$  mRNA production above resting levels, although to a lesser extent than changes following millimolar ATP concentrations. Given that  $\text{P}_2\text{X}_4$  responds to micromolar ATP, it is apparent that  $\text{P}_2\text{X}_4$  contributes most significantly under high frequency ATP stimulation, whereas  $\text{P}_2\text{X}_7$  accounts for the majority of  $\text{Ca}^{2+}$  entry at high ATP concentrations. We note that a report [49] demonstrated that  $\text{TNF}\alpha$  release was not reported in  $\text{P}_2\text{X}_7$  knock-out microglia under 24 hours of ATP treatment [49]. An important distinction in our protocol, however, is that we utilize short bursts of ATP that reduce that rate of  $\text{P}_2\text{X}_4$  desensitization.

Second, we demonstrate in Fig. 6B rates of ATP-mediated  $\text{TNF}\alpha$  production under conditions analogous to those in panel A. Importantly, we observe 1) significant rates of  $\text{TNF}\alpha$  production under high frequency, low amplitude ATP stimulation and 2) that the  $\text{TNF}\alpha$  production rates do not strictly correlate with increase  $\text{Ca}^{2+}$  load, as  $\text{TNF}\alpha$  production rates decrease with decreasing frequency. Overall, these results appear to establish bounds for the frequency and amplitude capable of evoking transcriptional responses.

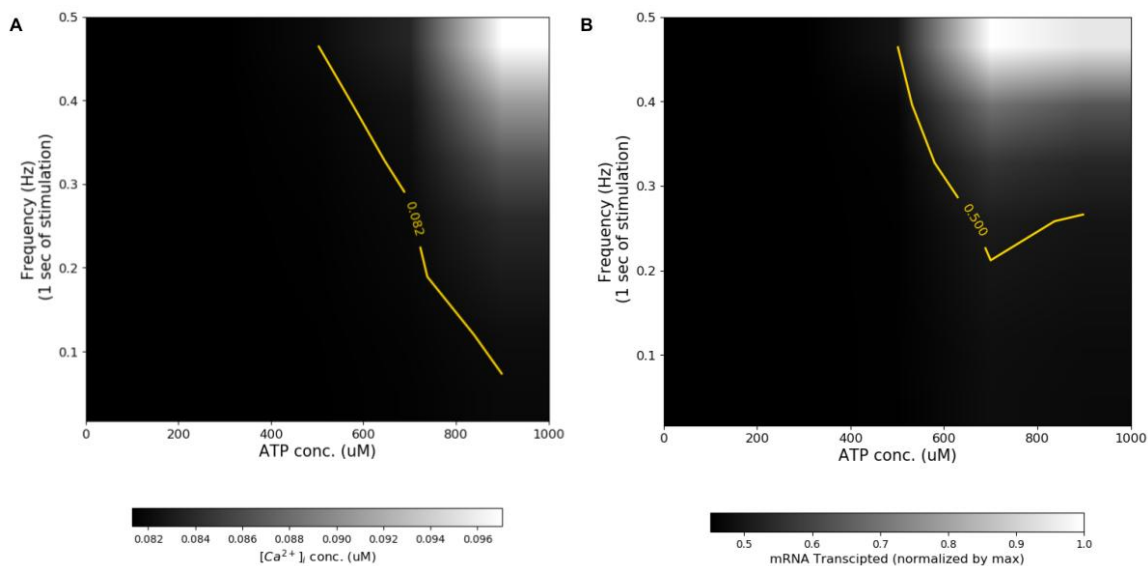

Figure 6: Predictions of free cytosolic Ca<sup>2+</sup> (A) and TNF $\alpha$  production (B) following pulsatile (1 second duration) ATP exposure for 100 seconds. ATP pulse frequency is varied from 0-0.5 Hz and concentration is varied up to 1 mM. The TNF $\alpha$  data were normalized by the maximum TNF $\alpha$  production under conditions considered. For reference, thresholds are drawn at Ca<sup>2+</sup>= $8.1 \times 10^{-2}$   $\mu$ M and TNF $\alpha$ =0.6. Ca<sup>2+</sup> transients are illustrated in Fig. S6. .

### 3.5 Sensitivity analysis and effects of partial (ant)agonism on $\text{TNF}\alpha$ production

Lastly, given that  $\text{TNF}\alpha$  transcription and release is collectively controlled by several  $\text{Ca}^{2+}$ -dependent compounds in our microglial model, we utilize sensitivity analysis to highlight parameters that most significantly influence the model predictions. Our central goal here was to provide predictions that can be tested with common experimental protocols, such as controlling gene expression, or the application of protein-specific inhibitors and agonists. Here, protein concentration was varied as a surrogate for up- or down-regulation, or to a certain extent, partial inhibition or agonism of a given target. In Fig. 7, we report the sensitivity of  $\text{TNF}\alpha$  mRNA production as a function of plasma membrane  $\text{Ca}^{2+}$  entry, as determined by purinoceptor concentration, NCX  $\text{Ca}^{2+}$  flux, and the rate of inward  $\text{Ca}^{2+}$  leak, subject to low and high ATP concentrations. Here, each line represents the rate of  $\text{TNF}\alpha$  mRNA production,  $r_{mRNA}$  relative to control versus the channel expression relative to control  $[P]$ . The slope of a given line,  $\Delta r_{mRNA}/\Delta[P]$ , indicates the sensitivity of the mRNA production relative to changes in channel expression. Since the  $\text{P}_2\text{X}$  receptors and the  $\text{Ca}^{2+}$  leak contribute inward  $\text{Ca}^{2+}$  current,  $\text{TNF}\alpha$  production is positively correlated with the concentration ( $\text{P}_2\text{X}$ ) or rate (leak) relative to control values. Importantly, the slope increases with increasing channel expression, which suggests that greater rates of  $\text{TNF}\alpha$  production are realized relative to control or equivalently, mRNA production could occur at lower ATP concentrations. Similarly, higher rates of  $\text{Ca}^{2+}$  influx via a non-specific, inward  $\text{Ca}^{2+}$  leak sensitizes  $\text{TNF}\alpha$  mRNA production, hence, the threshold for  $\text{TNF}\alpha$  production via  $\text{P}_2\text{X}$  stimulation is reduced. Analogously, reducing extracellular  $\text{Na}^+$  decreases and potentially reverses the rate of  $\text{Ca}^{2+}$  extrusion, which has the net effect of increasing intracellular  $\text{Ca}^{2+}$  relative to control. Hence, decreased rates of  $\text{Ca}^{2+}$  extrusion that arise from decreasing  $\text{Na}^+$  sensitizes  $\text{TNF}\alpha$  mRNA production.

In Fig. 8 we report similar measures of  $\text{TNF}\alpha$  production sensitivity to variations in CaM, CN, and NFAT. Given that the  $\text{Ca}^{2+}$ -dependent activation of these model components promote  $\text{TNF}\alpha$  expression, decreases in concentrations of these protein depressed  $\text{TNF}\alpha$  production, and conversely, their increase accelerated  $\text{TNF}\alpha$  production rates. Of these,  $\text{TNF}\alpha$  production was most sensitive to the modulation of CaM and CN, with a relatively minor dependence on ATP concentration. Among the proteins considered, CaM is known to increase expression upon activation [45], which suggests that  $\text{TNF}\alpha$  production may be accelerated in activated microglia.

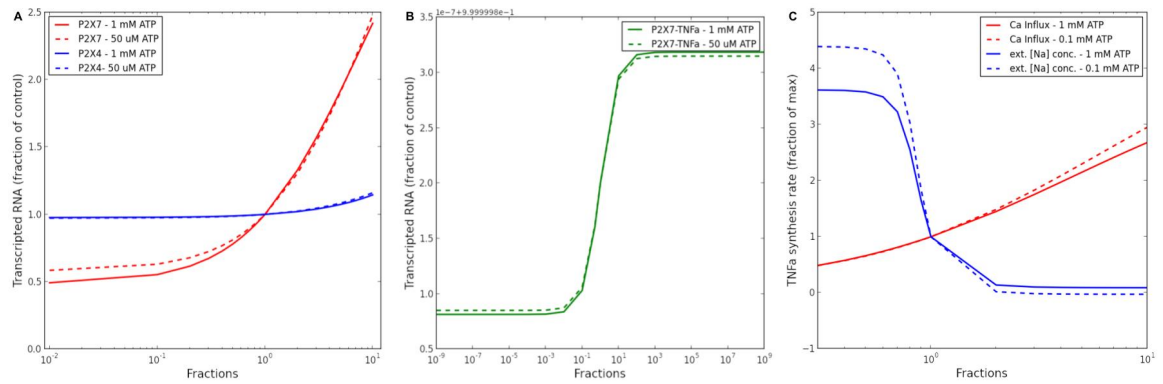

Figure 7: A. Sensitivity of TNF $\alpha$  production as a function of P<sub>2</sub>X<sub>4</sub> (red) and P<sub>2</sub>X<sub>7</sub> (blue) expression, subject to conditions from Fig. 8. B. Sensitivity analysis of TNF $\alpha$  dependency on P<sub>2</sub>X<sub>7</sub> open state. C. Analogous predictions for changes in inward Ca<sup>2+</sup> leak rate (blue) and extracellular Na<sup>+</sup>. Reduction of Na<sup>+</sup> reduces the Ca<sup>2+</sup>-extrusion rate from forward-mode NCX activity.

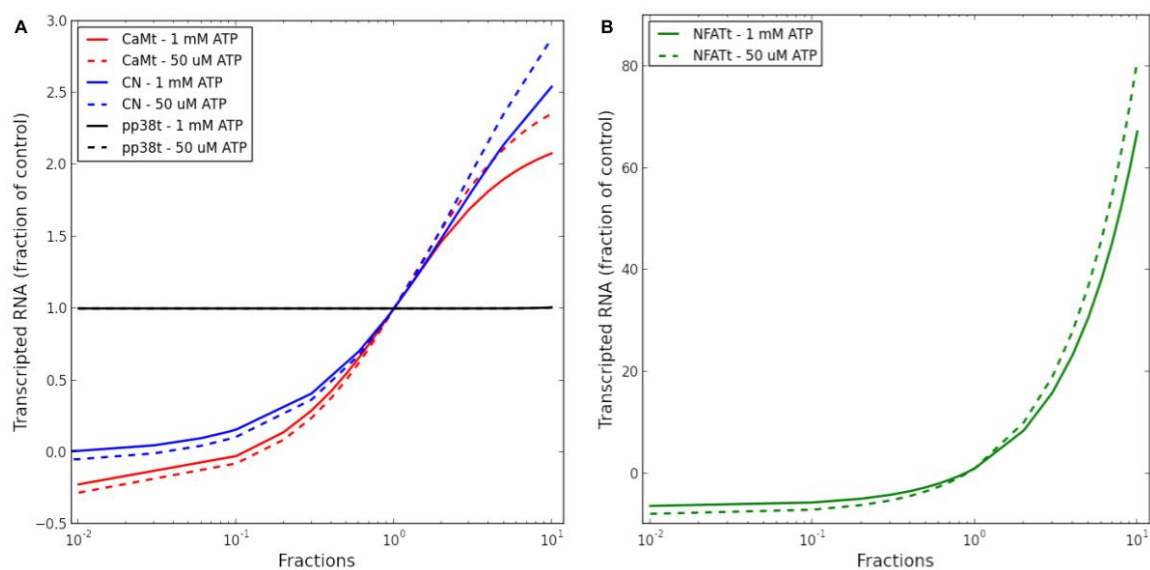

Figure 8: Sensitivity of predicted synthesis rate of TNF $\alpha$  to variations in model parameters. Degree of TNF $\alpha$  synthesized as a function of total CaM (red), CN (blue), NFAT (green) (B) or pp38 (black) concentration with respect to  $5 \times 10^{-1}$  Hz 0.05 and 1.0 mM ATP pulses for 100 seconds.

## 4 Discussion

### 4.1 Overarching outcomes

In this study, we have established a predictive, computational model. The computational model recapitulates ATP-dependent activity profiles for two prominent  $P_2X$  channels, parallel rises in intracellular  $Ca^{2+}$ , activation of the  $Ca^{2+}$ -dependent NFAT pathway, and ultimately cytokine production. With this minimal model, we assess the extent to which the intracellular signaling cascades are coupled to characteristics of extracellular ATP exposure, including the amplitude, frequency and duration of stimulation, as well as the sensitivity of activating signal transduction to variations in protein expression. The breadth of ATP signatures considered were intended to be representative of transient, small amplitude release events within synaptic junctions commonly surveilled by microglia [59, 27], as well as prolonged, concentrated ATP pools that could emerge from neuron damage [60]. The variations considered in the sensitivity analyses were reflective of known phenotypical changes in expression during microglial activation, as well as pharmacological or genetic strategies used in a variety of experiments to manipulate and understand microglia physiology. The model we developed integrates both biophysically motivated and phenomenological descriptions of purinergic receptors, NFAT-mediated gene expression pathways, cytosolic  $Ca^{2+}$  handling, as well as provides a framework to link a wide body of experiments probing microglial function (reviewed here [3, 61]). With this model we characterized the relative contributions of  $P_2X_4$  and  $P_2X_7$  in driving  $TNF\alpha$  production across a broad range of ATP time and concentration profiles and demonstrated how changes in protein expression and activity typical of microglial activation tune  $TNF\alpha$  mRNA expression. Most significantly, we provide computational evidence that  $TNF\alpha$  mRNA expression is possible from transient, high frequency exposure to ATP signals, thresholds for mRNA production are reduced under conditions typical of activated microglia, e.g. increased  $P_2X$  and CaM expression.

### 4.2 $P_2X$ receptor activation

Recently, there has been considerable focus on the modulation of purinergic receptors, including  $P_2X_4$  and  $P_2X_7$ , in controlling pain and inflammation, as reviewed in [62]. Both  $P_2X$  receptors are responsive to ATP released from damaged cells [59, 63, 64]. Although both channels are activated by ATP, the micromolar versus millimolar affinities of  $P_2X_4$  and  $P_2X_7$ , respectively, raise the possibility that the channels have distinctive roles in their responses to extracellular agonists.

Toward addressing this hypothesis, we implemented state-based models of  $P_2X_7$  and  $P_2X_4$  activation that could predict channel open probabilities over a broad ranges of ATP exposures. In turn, the current profiles were used to predict rates of intracellular  $Ca^{2+}$  entry. The channel models considered in this study were developed in prior works that examined  $P_2X$  channel activity for endogenous ATP, as well as several pharmacologic agonists and antagonists [37, 5, 19, 39]. These models consisted of at least eight and as many as 32

states to capture nuances of desensitization and changes in channel gating arising from pharmacological treatment. Our primary objective was to exclusively examine channel responses to ATP over a range of concentrations, durations, and frequencies, thus we opted for a simplified model with fewer free parameters. Overall, the reduced models, which shared the same number of states but with different gating parameters, reproduced experimentally-measured and predicted current profiles with acceptable accuracy. For this reason, the parsimonious model was appropriate for predicting increases in intracellular  $\text{Ca}^{2+}$  load, assuming that 8% of each channel's predicted current corresponded to  $\text{Ca}^{2+}$  influx, as suggested by Garcia-Guzman *et al.*[6]. We note, however, that further refinement of the model to reflect responses to  $\text{P}_2\text{X}_7$  and  $\text{P}_2\text{X}_4$  agonists like 3'-O-(4-Benzoyl)benzoyl ATP (BzATP) and ivermectin, respectively, could necessitate additional gating terms described in Yan *et al.* and Zemkova *et al.*[37, 19]

To determine the extent to which  $\text{P}_2\text{X}_4$  modulation impacted steady-state  $\text{Ca}^{2+}$  load and subsequent  $\text{TNF}\alpha$  production, we utilized a basic sensitivity analyses approach described in [28]. Our predictions of  $\text{P}_2\text{X}_4$  activity indicate that low amplitude ATP exposures of short duration ( $< 30$  seconds) across a broad range of frequencies were sufficient to trigger significant  $\text{Ca}^{2+}$  entry. Microglial  $\text{P}_2\text{X}_4$  thus, could serve a predominant role in processing small, highly transient, ATP signals arising from normal communication between in neural synapses [59], to activate a microglia-dependent modulation of synaptic function. An exciting possibility that remains to be tested is whether there are lower thresholds for ATP concentration and exposure duration that is sufficient to activate  $\text{P}_2\text{X}_4$ -dependent  $\text{Ca}^{2+}$  signaling in microglia. For instance, how many synapses with elevated ATP would a single microglia cell need to sample during a short duration (milliseconds-to-seconds) to activate a  $\text{P}_2\text{X}_4$  dependent  $\text{Ca}^{2+}$  response. Furthermore, since prolonged exposure to ATP is associated with increased membrane trafficking and mobility of  $\text{P}_2\text{X}_4$  [9], higher  $\text{P}_2\text{X}_4$  activity could prime microglia to have increased sensitivity to ATP, thus lowering the threshold of ATP needed to induce  $\text{P}_2\text{X}_4$ -dependent  $\text{Ca}^{2+}$  responses. The sensitivity analyses we conducted indeed demonstrate greater propensities for  $\text{TNF}\alpha$  mRNA production under conditions of ten-fold higher  $\text{P}_2\text{X}_4$  akin to activated microglia. It remains to be determined experimentally the extent to which simultaneous changes in microglial  $\text{Ca}^{2+}$  handling upon activation, such as increased CaM [45] and Iba-1 expression [65], could compensate for larger inward  $\text{Ca}^{2+}$  currents via increased  $\text{P}_2\text{X}_4$  expression. Beyond changes in expression, differences in subcellular localization could additionally counterbalance the effects of increased  $\text{P}_2\text{X}_4$  activity, such as the asymmetric distribution and mobility of  $\text{P}_2\text{X}_4$  between the microglial soma, and the microglial processes [9], as well as the localization of ATP encountered presumably by the microglia process at the synapse. Careful characterization of  $\text{P}_2\text{X}_4$  sub-cellular distribution, thus, may be important for understanding the channels ability to prime microglia to increased sensitivity to ATP.

Our computational simulations indicate  $\text{P}_2\text{X}_7$  responses predominate over  $\text{P}_2\text{X}_4$  at high ATP concentrations and prolonged exposure durations. Our com-



putational sensitivity analyses are also in agreement with the role of  $P_2X_7$  in ATP-dependent  $TNF\alpha$  production from microglia [8], and the effects of selective inhibitors of  $P_2X_7$  like KHG26792 [66, 67] that suppress  $TNF\alpha$  production. The distinct channel activation profiles of  $P_2X_4$  and  $P_2X_7$  likely provide microglia the ability to respond differently to low or high levels of ATP, by activating a neurotrophic [68], or cytokine response respectively. Moreover, selective inhibitors of  $P_2X_7$  may be useful in the case of pathologically elevated ATP, such as that seen after a traumatic brain injury, while selective agonists or antagonist of  $P_2X_4$  may be more useful in modulating microglia when subject to physiological levels of ATP.

### 4.3 Maintenance of cytosolic $Ca^{2+}$ content

Activation of microglia and exocytosis of cytokines and chemokines are strongly correlated with increased intracellular  $Ca^{2+}$  content. We observed that the sensitivity of ATP-triggered  $TNF\alpha$  production increased at elevated  $Ca^{2+}$  inward leak rates (see Fig. 7). The increased cytosolic  $Ca^{2+}$  load can arise from an arbitrary source, such as  $Ca^{2+}$  selective ionophores, which can increase mRNA expression independent of toll-like receptor signaling or purinergic receptor activation [47]. A primary goal of our model was therefore to couple the  $Ca^{2+}$  current carried by activated  $P_2X$  receptors to the intracellular  $Ca^{2+}$  pool. Our model found that cytosolic  $Ca^{2+}$  is strongly buffered, with as much as 90% of the inward  $Ca^{2+}$  buffered within the cytosol. CaM, CN and Iba-1 are among the most prominent  $Ca^{2+}$ -binding proteins identified in microglia, [3, 7, 13]. However, it is not clear if the microglia express sufficient CaM, CN and Iba-1 to account for 90% buffering of cytosolic  $Ca^{2+}$ . There may be other cytosolic  $Ca^{2+}$  proteins or molecules that we do not account for, or non-specific binding of  $Ca^{2+}$  to negatively-charged membrane that may explain this discrepancy. In cardiac tissue, of the intracellular components in common with microglia, ATP and SERCA buffer a substantial fraction of  $Ca^{2+}$  at rest and following  $Ca^{2+}$  channel activation, with SERCA accounting for the majority of  $Ca^{2+}$  binding [69]. Similarly, it is apparent that low- (micromolar) and high-affinity (sub-micromolar)  $Ca^{2+}$  binding to phospholipid membranes contribute roughly 42 and 15  $\mu M$  of buffering capacity [44]. Given the large surface area to volume ratio in resting microglia [70], it is plausible that its plasma membrane could significantly contribute to buffering intracellular  $Ca^{2+}$ .

We additionally observed that the sensitivity of ATP-triggered  $TNF\alpha$  production increased at elevated  $Ca^{2+}$  inward leak rates (see Fig. 7). This behavior is analogous to the positive correlation between  $TNF\alpha$  production sensitivity and  $P_2X$  expression, except here the change in cytosolic  $Ca^{2+}$  load can arise from an arbitrary source, such as treatment of microglial cells with  $Ca^{2+}$  selective [47] or non-selective ionophores [71]. In this regard and to a certain extent, diverse mechanisms that increase cytosolic  $Ca^{2+}$  load may comprise a positive feedback process, as the  $Ca^{2+}$ -dependent activation of genes that initially promote autocrine activity or enhance  $Ca^{2+}$  channel current in

principle can promote further gene expression. This feedback could provide a basis for an integrative activation of immune responses [49], whereby both danger-associated and pathogen-associated molecular patterns must be presented to invoke an immune activity. However, such feedback is nuanced, as it has been demonstrated that pathogen mimetic lipopolysaccharides (LPS) treatment blunts ATP-mediated  $P_2X$  responses [71], which warrants further model development to investigate this hypothesis.

In general, PM  $Ca^{2+}$  currents are counterbalanced by  $Ca^{2+}$  extrusion mechanisms to maintain constant  $Ca^{2+}$  load at rest. In our study, modest levels of  $Ca^{2+}$  entry via  $P_2X$  activation were compensated by forward mode extrusion of intracellular  $Ca^{2+}$  via NCX. Given the slower rate of  $Ca^{2+}$  efflux via NCX relative to SERCA uptake, transient increases in ER  $Ca^{2+}$  load were apparent in our model (see Fig. S5). While  $IP_3$  receptor-mediated  $Ca^{2+}$  release was beyond the scope of this study, it is possible that the transient increases in ER  $Ca^{2+}$  load could lead to more frequent spontaneous or  $IP_3$ -triggered ER  $Ca^{2+}$  release events [3, 7].  $IP_3$ -triggered ER  $Ca^{2+}$  release could lead to localized regions wherein  $Ca^{2+}$  is strongly elevated relative to bulk cytosol, which could disproportionately influence  $Ca^{2+}$  signal transduction pathways. Future models that account for the microglial morphology and spatial distribution of important signaling proteins may provide additional insights in microglial function.

#### 4.4 $Ca^{2+}$ /CaM/CN/NFAT signal transduction

In microglia, CaM is linked to cytoskeletal remodeling [72] and the activation of CN[16]. The CN phosphatase is well-established to play a significant role in glial physiological function, as reviewed in [16]. In response to elevated cytosolic  $Ca^{2+}$  levels, CaM and CN activation ensues whereby NFAT is dephosphorylated. The dephosphorylated NFAT translocates to the nucleus, where it modulates transcription. Similar levels of NFAT activation are reported in microglia treated with  $Ca^{2+}$  ionophore (A23187) [47], which suggests that  $Ca^{2+}$  alone is sufficient to invoke this response. CN and NFAT activation are known to be dependent on stimulation frequency [22, 15], thus it is of interest to understand the relationship of NFAT driven  $TNF\alpha$  expression in response to transient and sustained ATP stimuli. In this study, we specifically investigated the coupling between CN activation and dephosphorylation of NFAT, for which the latter is a substrate for  $TNF\alpha$  transcription [8]. We assumed in our model that full activation of CN proceeds through binding of  $Ca^{2+}$ -saturated CaM, as described in Saucerman *et al.*[20]. We found that rates of increased  $TNF\alpha$  directly correlated with the CaM-bound CN concentration and NFAT activation. Moreover, high frequency  $P_2X$  stimulation that led to sustained increases in cytosolic  $Ca^{2+}$  load were sufficient to maintain CN in an activated state capable of driving NFAT-dependent  $TNF\alpha$  production. Low frequency  $P_2X_7$  stimulation exhibited analogous behavior, as our computational model showed that inhibition of NFAT by nearly 100% substantially suppressed the  $TNF\alpha$  mRNA production rate 1 mM ATP, consistent with reported reductions in  $TNF\alpha$  following treatment with the NFAT inhibitor VIVIT in [18, 73]. Furthermore, our

computational model showed similar reductions when inhibiting CN activity, which were comparable to reductions reported in Rojanathammanee *et al.*[73] following 1  $\mu$ M treatments of the CN inhibitors FK506. On one hand, the ability of the computational model to capture both the  $\text{Ca}^{2+}$ -dependent activation of NFAT and the blunting of  $\text{TNF}\alpha$  production by CaM, CN or NFAT inhibition exemplify the exquisite coupling of gene expression in microglia to intracellular  $\text{Ca}^{2+}$  homeostasis, in addition to establishing the accuracy of the model. However, it is clear that additional regulatory mechanisms convolute this coupling, as pharmacologic inhibition of CN and VIVIT does not completely suppress  $\text{TNF}\alpha$  expression [18, 73].

#### 4.5 ATP-triggered $\text{TNF}\alpha$ synthesis and release

Our study focused on a representative cytokine associated with an activated microglial state. Our model for  $\text{TNF}\alpha$  expression was phenomenological in form, but captured key stages of mRNA transcription, with phenomenological representations for translation and  $\text{Ca}^{2+}$ -dependent exocytosis. We assumed deterministic rate expressions for these stages, which were found to qualitatively reproduce  $\text{TNF}\alpha$  ELISA assays following microglia activation [8, 73, 74] including following treatments with pp38, CN, and NFAT inhibitors, as well as increased mRNA expression upon increasing PM  $\text{Ca}^{2+}$  leak in analogy to ionophore treatment [47]. The agreement between the deterministic models assumed here and the experimental measurements suggests that the modeled  $\text{Ca}^{2+}$ -dependent processes are abundant in number and are frequent. In counter example, we anticipate that measurements performed on an individual cell or perhaps sub-cellular basis would be fewer and less frequent, which advocate for stochastic approaches commonly used for modeling gene expression in other cell types [75].

Our model assumed that  $\text{TNF}\alpha$  mRNA transcription is proportional to the nuclear content of dephosphorylated NFAT. While it is clear from our analyses that the frequency and concentration of ATP application could modulate NFAT activation and  $\text{TNF}\alpha$  mRNA transcription, the apparent dependence of  $\text{TNF}\alpha$  translation and exocytosis on  $\text{P}_2\text{X}_7$ -specific activation suggests that parallel regulatory mechanisms are required for microglial immune responses. More generally, it has been suggested that microglial activation is not 'all or none' and depends profoundly on the context of the activating stimuli [27]. Interestingly,  $\text{TNF}\alpha$  is known to feedback on  $\text{TNF}\alpha$ -receptors localized to the microglia plasma membrane, thereby contributing to further  $\text{TNF}\alpha$  biosynthesis and cytokine release [76]. It is plausible that transient ATP stimuli lead to brief  $\text{P}_2\text{X}$  activation intervals that result in a limited exocytosed  $\text{TNF}\alpha$  pool insufficient for autocrine activity, whereas prolonged ATP exposure could promote sufficient  $\text{TNF}\alpha$  release to activate  $\text{TNF}\alpha$ -receptors. The former scenario may be appropriate for regulating synaptic plasticity mediated by  $\text{TNF}\alpha$ [59], especially given the quantile nature of ATP release exhibited by astrocytes [57]. In the latter scenario, however, released cytokines could lead to more robust activation of microglial cytokine receptors, thereby driving phenotypical changes that may represent the tipping point between acute and sustained microglial activation [76].

## 4.6 Limitations

Our computational model used a minimal basis for linking microglial  $P_2X$  activation with  $TNF\alpha$  production. The model provides a starting point for adding in additional factors and fine tuning the model with new experimental data. Additional factors that could be considered in the model include microglial heterogeneity due to genetics, age, and disease, cultured microglia versus *in vivo* cells, as well as differences in the neuronal and glia populations in different regions of the CNS that influence the cell-to-cell interactions. Our study examined  $P_2X$  activation given their importance in microglia activation and inflammatory responses. However,  $P_2Y$  receptors are also highly expressed in microglia and respond to micromolar ATP concentrations [8]. Future computational models can integrate and explore the interaction of  $P_2Y$  with  $P_2X$  responses similarly to the way we compared  $P_2X_4$  versus  $P_2X_7$ . Finally, beyond purinergic receptors, microglia express a myriad of other cell surface receptors, such as the toll-like receptors, involved in cytokine signaling, which we could integrate into future models.

In addition to intracellular,  $IP_3$  receptor-mediated  $Ca^{2+}$  production, we omitted store operated  $Ca^{2+}$  entry (SOCE). SOCE describes a mechanism, by which depletion of ER  $Ca^{2+}$  is sensed by Stromal interaction molecule 1 (STIM1), after which activated STIM promotes extracellular  $Ca^{2+}$  entry by binding ORAI1 [3]. SOCE is prominent in microglia and is known to increase steady-state  $Ca^{2+}$  influx following prolonged ATP treatments [3]. However, under the conditions considered in our model, our predictions demonstrated minimal changes in ER  $Ca^{2+}$  load, given the absence of  $IP_3$  receptor-mediated release. Hence, therefore we do not anticipate contributions from SOCE that would influence the model predictions under the stimuli we considered. We note that introducing this contribution to cytosolic  $Ca^{2+}$  handling in subsequent models would be advantageous for examining how long-lived elevations in  $Ca^{2+}$  load control activated microglial responses including the release of cytokines, chemokines, nitric oxide as well as reactive oxygen species. [77]

Beyond purinergic receptors, myriad plasma membrane channels have been identified in microglia. Many of these channels, particularly those controlling potassium transmembrane currents [78], have altered expression levels depending on the maturity and potential pathological state of the microglial cell [79]. Given the prominent role of potassium channels in determining the membrane potential, we could expect phenotype-dependent changes in the electrogenic driving forces governing voltage-gated channel and exchanger activity. For instance, though our model demonstrates NCX operates in forward mode to extrude cytosolic  $Ca^{2+}$ , hyper-polarization of the membrane potential could induce reverse-mode NCX activity that would increase intracellular  $Ca^{2+}$  load. Overall, inclusion of channels that overwhelmingly control microglia membrane potentials would permit more detailed examinations of microglia activation and phenomena in pathological states.

Our model of  $TNF\alpha$  expression assumed NFAT-dependent mRNA production, followed by degradation [48], translation and exocytosis process that were phenomenologically dependent on p38 phosphorylation. However, there exist

a variety of regulatory mechanisms of gene expression that were not considered in this study. For instance, extracellular signal-regulated kinases (ERK) and c-Jun N-terminal kinase (JNK) inhibition in microglia has been demonstrated to both reduce CXCL2 mRNA expression and TNF $\alpha$  exocytosis [8] and following P<sub>2</sub>X<sub>7</sub> activation [48]. Hence, it is plausible that several mitogen-activated protein kinase (MAPK)s work in tandem to finely control TNF $\alpha$  mRNA expression. Additionally, translation of expressed TNF $\alpha$  mRNA and its eventual exocytosis is tightly regulated by diverse trafficking and secretion pathways, as reviewed in Stanley *et al.* [56] for TNF $\alpha$  release in macrophages. Refinement of our model to include such pathways, as well as their differential regulation by P<sub>2</sub>X<sub>7</sub> versus P<sub>2</sub>X<sub>4</sub>, could elucidate the cocktail of stimuli required for encoding specific patterns of microglia-derived signaling molecule expression.

## 5 Conclusions

In this study, we have developed a computational model of Ca<sup>2+</sup> handling in microglia that links ATP-dependent activation of P<sub>2</sub>X<sub>4</sub> and P<sub>2</sub>X<sub>7</sub> activation to production of a representative cytokine, TNF $\alpha$ . We validated this model against a wealth of experimental data collected for these purinergic receptors and intracellular components that regulate Ca<sup>2+</sup> homeostasis and gene expression. We have demonstrated using this model how the temporal signature of ATP activation influences the ability to evoke TNF $\alpha$  production. Furthermore, we examined how variation of the expression of the microglia proteins considered in this model impacts the ATP-sensitivity of TNF $\alpha$  production, so as to provide insight in how microglia respond and adapt to their environment. We anticipate that this model will be invaluable generating and testing hypotheses pertaining to microglial physiology at a systems level, as has been demonstrated in other computational models of mammalian cellular function [4].

## 6 Acknowledgements

Research reported in this publication, release was supported by the Maximizing Investigators' Research Award (MIRA) (R35) from the National Institute of General Medical Sciences (NIGMS) of the National Institutes of Health (NIH) under grant number R35GM124977. PKH would like to acknowledge John Gensel, Ph.D. for critical discussion of the manuscript.

## Bibliography

- [1] Won Suk Chung, Christina A. Welsh, Ben A. Barres, and Beth Stevens. Do glia drive synaptic and cognitive impairment in disease? *Nature Neuroscience*, 18(11):1539–1545, 2015.
- [2] Horia Pribiag and David Stellwagen. Neuroimmune regulation of homeostatic synaptic plasticity. *Neuropharmacology*, 78(C):13–22, 2014.
- [3] Helmut Kettenmann, Uwe-Karsten Hanisch, Mami Noda, and Alexei Verkhratsky. Physiology of Microglia. *Physiol Rev*, 91:461–553, 2011.
- [4] R L Winslow, N Trayanova, D Geman, and M I Miller. Computational Medicine: Translating Models to Clinical Care. *Science Translational Medicine*, 4(158):158rv11–158rv11, 2012.
- [5] A Khadra, Z Yan, C Coddou, M Tomic, A Sherman, and S S Stojilkovic. Gating properties of the P2X2a and P2X2b receptor channels: Experiments and mathematical modeling. *The Journal of general physiology*, 139(5):333–348, 2012.
- [6] M Garcia-Guzman, F Soto, J M Gomez-Hernandez, P E Lund, and W Stuehmer. Characterization of recombinant human P2X4 receptor reveals pharmacological differences to the rat homologue. *Molecular pharmacology*, 51(1):109–118, 1997.
- [7] Alexei Noda, Mami and Verkhratsky. Physiology of Microglia. In Bruce Kettenmann, Helmut and Ransom, editor, *Neuroglia*, pages 223–237. Oxford Univ Press, 3 edition, 2012.
- [8] Izumi Hide, Masaya Tanaka, Atsuko Inoue, Kazuyuki Nakajima, Shinichi Kohsaka, Kazuhide Inoue, and Yoshihiro Nakata. Extracellular ATP triggers tumor necrosis factor- $\alpha$  release from rat microglia. *Journal of Neurochemistry*, 75(3):965–972, jan 2000.
- [9] Estelle Toulme and Baljit S Khakh. Imaging P2X4 receptor lateral mobility in microglia: Regulation by calcium and p38 MAPK. *Journal of Biological Chemistry*, 287(18):14734–14748, 2012.
- [10] a. R. Ase, N. S. Honson, H. Zaghane, T. a. Pfeifer, and P. Seguela. Identification and Characterization of a Selective Allosteric Antagonist of Human P2X4 Receptor Channels. *Molecular Pharmacology*, 87(April):606–616, 2015.
- [11] R. Alan North. P2X receptors. *Philosophical Transactions of the Royal Society B: Biological Sciences*, 371(1700):20150427, 2016.
- [12] Alexander Skupin, Helmut Kettenmann, Ulrike Winkler, Maria Wartenberg, Heinrich Sauer, Stephen C Tovey, Colin W Taylor, and Martin Falcke. How does intracellular Ca<sup>2+</sup> oscillate: by chance or by the clock? *Biophysical journal*, 94(6):2404–11, mar 2008.
- [13] Alexei Verkhratsky and Arthur Butt. *Glial Neurobiology: A Textbook*. 2007.



- [14] Claudio Coddou, Zonghe Yan, Tomas Obsil, J. Pablo Huidobro-Toro, and Stanko S. Stojilkovic. Activation and Regulation of Purinergic P2X Receptor Channels. *Pharmacological Reviews*, 63(3):641–683, 2011.
- [15] Michael T. Cooling, Peter Hunter, and Edmund J. Crampin. Sensitivity of NFAT cycling to cytosolic calcium concentration: Implications for hypertrophic signals in cardiac myocytes. *Biophysical Journal*, 96(6):2095–2104, 2009.
- [16] Jennifer L Furman and Christopher M Norris. Calcineurin and glial signaling: neuroinflammation and beyond. *Journal of Neuroinflammation*, 11(1):158, dec 2014.
- [17] Davide Ferrari, Christopher Stroh, and Klaus Schulze-Osthoff. P2X 7 /P2Z Purinoreceptor-mediated Activation of Transcription Factor NFAT in Microglial Cells. *Journal of Biological Chemistry*, 274(19):13205–13210, may 1999.
- [18] K. Nagamoto-Combs and C. K. Combs. Microglial Phenotype Is Regulated by Activity of the Transcription Factor, NFAT (Nuclear Factor of Activated T Cells). *Journal of Neuroscience*, 30(28):9641–9646, jul 2010.
- [19] Hana Zemkova, Anmar Khadra, Milos B Rokic, Vendula Tvrdonova, Arthur Sherman, and Stanko S Stojilkovic. Allosteric regulation of the P2X4 receptor channel pore dilation. *Pflugers Archiv - European Journal of Physiology*, 467(4):713–726, apr 2015.
- [20] Jeffrey J Saucerman and Donald M Bers. Calmodulin Mediates Differential Sensitivity of CaMKII and Calcineurin to Local Ca<sup>2+</sup> in Cardiac Myocytes. *Biophysical Journal*, 95(10):4597–4612, nov 2008.
- [21] T R Shannon, F Wang, J Puglisi, C Weber, and D M Bers. A mathematical treatment of integrated Ca dynamics within the ventricular myocyte. *Biophysical Journal*, 87(5):3351–3371, 2004.
- [22] Hojjat Bazzazi, Lingjie Sang, Ivy E. Dick, Rosy Joshi-Mukherjee, Wanjun Yang, and David T. Yue. Novel fluorescence resonance energy transfer-based reporter reveals differential calcineurin activation in neonatal and adult cardiomyocytes. *Journal of Physiology*, 593(17):3865–3884, 2015.
- [23] Michael J Berridge, Martin D Bootman, and H Llewelyn Roderick. Calcium signalling: dynamics, homeostasis and remodelling. *Nature Reviews Molecular Cell Biology*, 4(7):517–529, 2003.
- [24] Raimond L. Winslow, Mark A. Walker, and Joseph L. Greenstein. Modeling calcium regulation of contraction, energetics, signaling, and transcription in the cardiac myocyte. *Wiley Interdisciplinary Reviews: Systems Biology and Medicine*, 8(1):37–67, 2016.
- [25] Dimitrios Davalos, Jaime Grutzendler, Guang Yang, Jiyun V Kim, Yi Zuo, Steffen Jung, Dan R Littman, Michael L Dustin, and Wen-Biao Gan. ATP mediates rapid microglial response to local brain injury in vivo. *Nature Neuroscience*, 8(6):752–758, jun 2005.

- [26] Ratchaniporn Kongsui, Sarah B. Beynon, Sarah J. Johnson, and Frederick Rohan Walker. Quantitative assessment of microglial morphology and density reveals remarkable consistency in the distribution and morphology of cells within the healthy prefrontal cortex of the rat. *Journal of Neuroinflammation*, 11(1), 2014.
- [27] Uwe-Karsten Hanisch and Helmut Kettenmann. Microglia: active sensor and versatile effector cells in the normal and pathologic brain. *Nature Neuroscience*, 10(11):1387–1394, nov 2007.
- [28] Bradley D. Stewart, Caitlin E. Scott, Thomas P. McCoy, Guo Yin, Florin Despa, Sanda Despa, and Peter M. Kekenyes-Huskey. Computational modeling of amylin-induced calcium dysregulation in rat ventricular cardiomyocytes. *Cell Calcium*, 71:65–74, may 2018.
- [29] Linda Petzold. Automatic Selection of Methods for Solving Stiff and Non-stiff Systems of Ordinary Differential Equations. *SIAM Journal on Scientific and Statistical Computing*, 4(1):136–148, mar 1983.
- [30] M. Srinivas and Lalit M. Patnaik. Genetic Algorithms: A Survey. *Computer*, 27(6):17–26, 1994.
- [31] Vertical Sleeve Gastrectomy and Associated Risk. Allosteric Regulation of the P2X4 Receptor Channel Pore Dilation. 23(5):1079–1084, 2016.
- [32] B S Khakh, X R Bao, C Labarca, and H A Lester. Neuronal P2X transmitter-gated cation channels change their ion selectivity in seconds. *Nature neuroscience*, 1999.
- [33] D S K Samways, B S Khakh, S. Dutertre, and T. M. Egan. Preferential use of unobstructed lateral portals as the access route to the pore of human ATP-gated ion channels (P2X receptors). *Proceedings of the National Academy of Sciences*, 108(33):13800–13805, aug 2011. ISSN 0027-8424.
- [34] Terrance M Egan. Contribution of Calcium Ions to P2X Channel Responses. *Journal of Neuroscience*, 24(13):3413–3420, mar 2004.
- [35] Terrance M. Egan, Damien S K Samways, and Zhiyuan Li. Biophysics of P2X receptors. *Pflugers Archiv : European journal of physiology*, 452(5): 501–12, aug 2006.
- [36] Estelle Toulme, Angie Garcia, Damien Samways, Terrance M. Egan, Monica J. Carson, and Baljit S. Khakh. P2X4 receptors in activated C8-B4 cells of cerebellar microglial origin. *The Journal of General Physiology*, 135(4): 333–353, 2010.
- [37] Z. Yan, A. Khadra, S. Li, M. Tomic, A. Sherman, and S. S. Stojilkovic. Experimental Characterization and Mathematical Modeling of P2X7 Receptor Channel Gating. *Journal of Neuroscience*, 30(42):14213–14224, 2010.
- [38] I. P. Chessell, A. D. Michel, and P. P A Humphrey. Properties of the pore-forming P2X7 purinoceptor in mouse NTW8 microglial cells. *British Journal of Pharmacology*, 121(7):1429–1437, 1997.



- [39] Laurent Mackay, Hana Zemkova, Stanko S. Stojilkovic, Arthur Sherman, and Anmar Khadra. Deciphering the regulation of P2X4 receptor channel gating by ivermectin using Markov models. *PLoS Computational Biology*, 13(7):1–27, 2017.
- [40] N P Smith and E J Crampin. Development of models of active ion transport for whole-cell modelling: cardiac sodium potassium pump as a case study. *Progress in biophysics and molecular biology*, 85(2-3):387–405, 2004.
- [41] Lubomira Lencesova, Andrea O’Neill, Wendy G Resneck, Robert J Bloch, and Mordecai P Blaustein. Plasma membrane-cytoskeleton-endoplasmic reticulum complexes in neurons and astrocytes. *The Journal of biological chemistry*, 279(4):2885–93, jan 2004.
- [42] Vera A. Golovina. Visualization of localized store-operated calcium entry in mouse astrocytes. Close proximity to the endoplasmic reticulum. *The Journal of Physiology*, 564(3):737–749, may 2005.
- [43] Francesca Boscia, Rosaria Gala, Anna Pannaccione, Agnese Secondo, Antonella Scorziello, Gianfranco Di Renzo, and Lucio Annunziato. NCX1 expression and functional activity increase in microglia invading the infarct core. *Stroke*, 40(11):3608–3617, nov 2009.
- [44] JanA. Post and GlennA. Langer. Sarcolemmal calcium binding sites in heart: I. Molecular origin in gas-dissected sarcolemma. *The Journal of Membrane Biology*, 129(1):49–57, jul 1992.
- [45] C. Sola, J.M M. Tusell, and J. Serratosa. Calmodulin is expressed by reactive microglia in the hippocampus of kainic acid-treated mice. *Neuroscience*, 81(3):699–705, dec 1997.
- [46] Daisuke Ito, Kortaro Tanaka, Shigeaki Suzuki, Tomohisa Dembo, and Yasuo Fukuuchi. Enhanced expression of Iba1, ionized calcium-binding adapter molecule 1, after transient focal cerebral ischemia in rat brain. *Stroke*, 32(5):1208–1215, 2001.
- [47] Ayako Kataoka, Hidetoshi Tozaki-Saitoh, Yui Koga, Makoto Tsuda, and Kazuhide Inoue. Activation of P2X7 receptors induces CCL3 production in microglial cells through transcription factor NFAT. *Journal of Neurochemistry*, 108(1):115–125, jan 2009.
- [48] Miho Shiratori, Hidetoshi Tozaki-Saitoh, Mai Yoshitake, Makoto Tsuda, and Kazuhide Inoue. P2X7 receptor activation induces CXCL2 production in microglia through NFAT and PKC/MAPK pathways. *Journal of Neurochemistry*, 114(3):810–819, may 2010.
- [49] Chu Hsin Shieh, Annette Heinrich, Tsvetan Serchov, Dietrich van Calker, and Knut Biber. P2X7-dependent, but differentially regulated release of IL-6, CCL2, and TNF- $\alpha$  in cultured mouse microglia. *Glia*, 62(4):592–607, 2014.
- [50] Flavia V. Santa-Cecilia, Benjamin Socias, Mohand O. Ouidja, Julia E. Sepulveda-Diaz, Leonardo Acuna, Rangel L. Silva, Patrick P. Michel,

- Elaine Del-Bel, Thiago M. Cunha, and Rita Raisman-Vozari. Doxycycline Suppresses Microglial Activation by Inhibiting the p38 MAPK and NF- $\kappa$ B Signaling Pathways. *Neurotoxicity Research*, 29(4):447–459, 2016.
- [51] Davide Ferrari, Christopher Stroh, and Klaus Schulze-Osthoff. P2X 7 /P2Z Purinoreceptor-mediated Activation of Transcription Factor NFAT in Microglial Cells. *Journal of Biological Chemistry*, 274(19):13205–13210, may 1999.
- [52] Ru-Rong Ji and Marc R Suter. p38 MAPK, microglial signaling, and neuropathic pain. *Molecular Pain*, 3(1):33, 2007.
- [53] L H Boise, B Petryniak, X Mao, C H June, C Y Wang, T Lindsten, R Bravo, K Kovary, J M Leiden, and C B Thompson. The NFAT-1 DNA binding complex in activated T cells contains Fra-1 and JunB. *Molecular and cellular biology*, 13(3):1911–9, 1993.
- [54] Manoj B Menon and Matthias Gaestel. MK2-TNF-Signaling Comes Full Circle. *Trends in Biochemical Sciences*, 43(3):170–179, mar 2018.
- [55] Alain Destexhe, Z F Mainen, and Terrence J. Sejnowski. Kinetic models of synaptic transmission. *Methods in Neuronal Modeling*, pages 1–25, 1998.
- [56] A. C. Stanley and P. Lacy. Pathways for Cytokine Secretion. *Physiology*, 25(4):218–229, 2010.
- [57] Ulyana Lalo, Oleg Palygin, Seyed Rasooli-Nejad, Jemma Andrew, Philip G. Haydon, and Yuriy Pankratov. Exocytosis of ATP From Astrocytes Modulates Phasic and Tonic Inhibition in the Neocortex. *PLoS Biology*, 12(1):e1001747, jan 2014.
- [58] Alla V Tsytsykova, James V Falvo, Marc Schmidt-Supprian, Gilles Courtis, Dimitris Thanos, and Anne E Goldfeld. Post-induction, Stimulus-specific Regulation of Tumor Necrosis Factor mRNA Expression. *Journal of Biological Chemistry*, 282(16):11629–11638, apr 2007.
- [59] Jeff A. Stogsdill and Cagla Eroglu. The interplay between neurons and glia in synapse development and plasticity. *Current Opinion in Neurobiology*, 42:1–8, 2017.
- [60] Gerhard Eichhoff, Bianca Brawek, and Olga Garaschuk. Microglial calcium signal acts as a rapid sensor of single neuron damage in vivo. *Biochimica et Biophysica Acta (BBA) - Molecular Cell Research*, 1813(5):1014–1024, may 2011.
- [61] Alexej Verkhratsky, Richard K Orkand, and Helmut Kettenmann. Glial calcium: homeostasis and signaling function. *Physiological reviews*, 78(1): 99–141, jan 1998.
- [62] Yung-Hui Kuan and Bai-Chuang Shyu. Nociceptive transmission and modulation via P2X receptors in central pain syndrome. *Molecular Brain*, 9(1):1, 2016.

- [63] Schuichi Koizumi, Kayoko Fujishita, and Kazuhide Inoue. Regulation of cell-to-cell communication mediated by astrocytic ATP in the CNS. *Purinergic Signalling*, 1(3):211–217, 2005.
- [64] Peter Illes and J. Alexandre Ribeiro. Molecular physiology of P2 receptors in the central nervous system. *European Journal of Pharmacology*, 483(1): 5–17, 2004.
- [65] J B Bederson, L H Pitts, M Tsuji, M C Nishimura, R L Davis, and H Bartkowski. Rat middle cerebral artery occlusion: evaluation of the model and development of a neurologic examination. *Stroke*, 17(3):472–6, may 2001.
- [66] Hongjun Jin, Junbin Han, Derek Resing, Hui Liu, Xuyi Yue, Rebecca L. Miller, Kathleen M. Schoch, Timothy M. Miller, Joel S. Perlmutter, Terrance M. Egan, and Zhude Tu. Synthesis and in vitro characterization of a P2X7 radioligand [123I]TZ6019 and its response to neuroinflammation in a mouse model of Alzheimer disease. *European Journal of Pharmacology*, 820(July 2017):8–17, 2018.
- [67] Eun-A Kim, Chang Hun Cho, Jiae Kim, Hoh-Gyu Hahn, Soo Young Choi, Seung-Ju Yang, and Sung-Woo Cho. The azetidine derivative, KHG26792 protects against ATP-induced activation of NFAT and MAPK pathways through P2X7 receptor in microglia. *NeuroToxicology*, 51:198–206, dec 2015.
- [68] T Trang, S Beggs, X Wan, and M W Salter. P2X4-Receptor-Mediated Synthesis and Release of Brain-Derived Neurotrophic Factor in Microglia Is Dependent on Calcium and p38-Mitogen-Activated Protein Kinase Activation. *Journal of Neuroscience*, 29(11):3518–3528, 2009.
- [69] Donald M Bers. *Excitation-Contraction Coupling and Cardiac Contractile Force*, volume 1. Kluwer Academic Publishers, Kluwer Academic Publishers, 2001.
- [70] Andreas Beck, Reinhold Penner, and Andrea Fleig. Lipopolysaccharide-induced down-regulation of Ca<sup>2+</sup> release-activated Ca<sup>2+</sup> currents (I<sub>CRAC</sub>) but not Ca<sup>2+</sup>-activated TRPM4-like currents (I<sub>CAN</sub>) in cultured mouse microglial cells. *The Journal of physiology*, 586(2):427–39, jan 2008.
- [71] Anja Hoffmann, Oliver Kann, Carsten Ohlemeyer, Uwe-Karsten Hanisch, and Helmut Kettenmann. Elevation of basal intracellular calcium as a central element in the activation of brain macrophages (microglia): suppression of receptor-evoked calcium signaling and control of release function. *The Journal of neuroscience : the official journal of the Society for Neuroscience*, 23(11):4410–9, jun 2003.
- [72] Melinda Szabo, Karolina Dulka, and Karoly Gulya. Calmodulin inhibition regulates morphological and functional changes related to the actin cytoskeleton in pure microglial cells. *Brain Research Bulletin*, 120:41–57, jan 2016.
- [73] Lalida Rojanathammanee, Angela M. Floden, Gunjan D. Manocha, and Colin K. Combs. Attenuation of microglial activation in a mouse model

- of Alzheimer's disease via NFAT inhibition. *Journal of Neuroinflammation*, 12(1), 2015.
- [74] Sara Martinez-martinez and Juan Miguel Redondo. Inhibitors of the Calcineurin / NFAT Pathway. *Current Medicinal Chemistry*, 11:997–1007, 2004.
- [75] Dirk Gillespie. A review of steric interactions of ions: Why some theories succeed and others fail to account for ion size. *Microfluidics and Nanofluidics*, 18(5-6):717–738, 2015.
- [76] Reiko Kuno, Jinyan Wang, Jun Kawanokuchi, Hideyuki Takeuchi, Tetsuya Mizuno, and Akio Suzumura. Autocrine activation of microglia by tumor necrosis factor- $\alpha$ . *Journal of Neuroimmunology*, 162(1-2):89–96, 2005.
- [77] Martin James Stebbing, Jennifer Marie Cottee, and Indrajeetsinh Rana. The Role of Ion Channels in Microglial Activation and Proliferation A Complex Interplay between Ligand-Gated Ion Channels, K<sup>+</sup> Channels, and Intracellular Ca<sup>2+</sup>. *Frontiers in Immunology*, 6:497, oct 2015.
- [78] Hai M. Nguyen, Linda V. Blomster, Palle Christophersen, and Heike Wulff. Potassium channel expression and function in microglia: Plasticity and possible species variations. *Channels*, 11(4):305–315, jul 2017.
- [79] Claudia Eder. Ion channels in microglia (brain macrophages). *American Journal of Physiology-Cell Physiology*, 275(2):C327–C342, aug 1998.
- [80] Joerg Heineke and Jeffery D. Molkenkin. Regulation of cardiac hypertrophy by intracellular signalling pathways. *Nature Reviews Molecular Cell Biology*, 7(8):589–600, 2006.
- [81] Laura Korvers, Amanda de Andrade Costa, Martin Mersch, Vitali Matyash, Helmut Kettenmann, and Marcus Semtner. Spontaneous Ca<sup>2+</sup>transients in mouse microglia. *Cell Calcium*, 60(6):396–406, 2016.
- [82] Malgorzata Zawadzka, Michal Dabrowski, Agata Gozdz, Barbara Szadujkis, Marcin Sliwa, Maciej Lipko, and Bozena Kaminska. Early steps of microglial activation are directly affected by neuroprotectant FK506 in both in vitro inflammation and in rat model of stroke. *Journal of Molecular Medicine*, 90(12):1459–1471, dec 2012.
- [83] Shumin Duan, Christopher M Anderson, Edmund C Keung, Yongmei Chen, Yiren Chen, and Raymond A Swanson. P2X7 receptor-mediated release of excitatory amino acids from astrocytes. *Journal of Neuroscience*, 23(4):1320–1328, 2003.
- [84] R Madelaine Paredes, Julie C Etzler, Lora Talley Watts, and James D Lechleiter. Chemical Calcium Indicators. *Imaging*, 46(3):143–151, 2009.
- [85] Jin Wang and Ye Yu. Insights into the channel gating of P2X receptors from structures, dynamics and small molecules. *Acta Pharmacologica Sinica*, 37(1):44–55, 2016.

- [86] David C. Wright, Paige C. Geiger, Dong Ho Han, Terry E. Jones, and John O. Holloszy. Calcium induces increases in peroxisome proliferator-activated receptor  $\gamma$  coactivator-1 $\alpha$  and mitochondrial biogenesis by a pathway leading to p38 mitogen-activated protein kinase activation. *Journal of Biological Chemistry*, 282(26):18793–18799, jun 2007.
- [87] P G Hogan, P G Hogan, L Chen, and L Chen. Transcriptional regulation by calcium, calcineurin. *and NFAT. Genes Dev.*, 17(18):2205–2232, 2003.
- [88] Peter J. Cullen and Peter J. Lockyer. Integration of calcium and Ras signalling. *Nature Reviews Molecular Cell Biology*, 3(5):339–348, 2002.
- [89] Natalia Trempolec, Natalia Dave-Coll, and Angel R. Nebreda. SnapShot: P38 mapk signaling. *Cell*, 152(3):656–656.e1, 2013.
- [90] H Kawasaki, T Morooka, S Shimohama, J Kimura, T Hirano, Y Gotoh, and E Nishida. Activation and involvement of p38 mitogen-activated protein kinase in glutamate-induced apoptosis in rat cerebellar granule cells. *The Journal of biological chemistry*, 272(30):18518–21, jul 1997.
